# Supplementary material
Source: PubMed Central journal article supplement (PMC7374950)

# Supplementary Figure 2

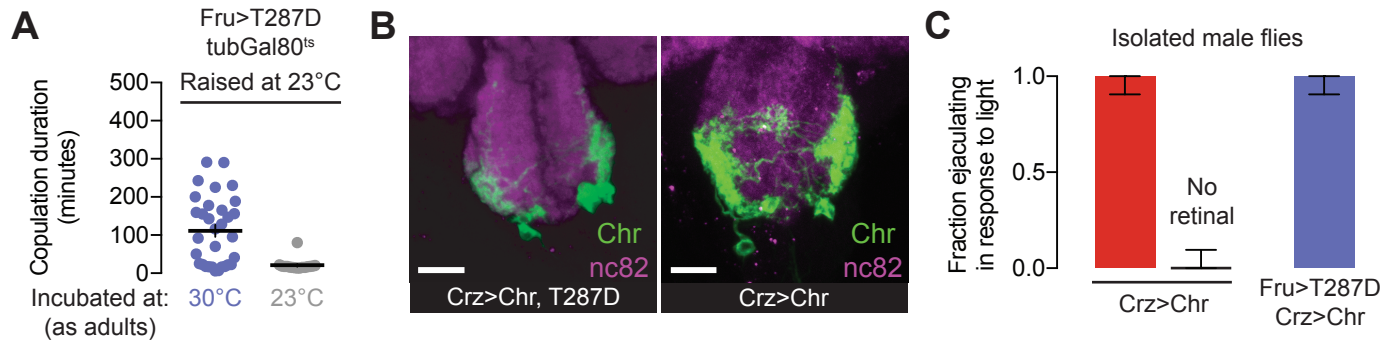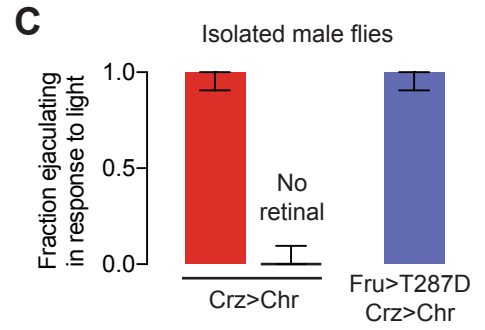

Supplement: NIHMS1595129-supplement-Supplementary_Figure_2.pdf [file NIHMS1595129-supplement-Supplementary_Figure_2.pdf]
